# Supplementary material
Source: Springer Nature journal article supplement (https://www.springermedizin.de/resource/supplementary/12879_2009_854_MOESM1_ESM.pdf/9449932)
Supplement: MOESM1 [file 9449932]

**Parent study**  
126 pregnant women with bacterial vaginosis

53 Oral treatment

53 vaginal treatment

9 preterm  
delivery

26 term  
delivery

6 preterm  
delivery

18 term  
delivery

1 missing specimen

4 missing specimens

1 specimen did not amplify  
18S DNA

8 preterm  
delivery

22 term  
delivery

6 preterm  
delivery

17 term  
delivery

**Sub-study: 53 subjects**
